# Supplementary material for: Longitudinal analysis of the Five Sisters hot springs in Yellowstone National Park reveals a dynamic thermoalkaline environment
Source: Springer Nature journal article supplement (doi:10.1038/s41598-022-22047-w), 2022-11-04
Supplement: MOESM1 [file 41598_2022_22047_MOESM1_ESM.pdf]

|                    | TC | Potassium | Chloride | Sodium | Arsenic | Molybdenum | NPOC | Zinc | Sulfate | DO |
|--------------------|----|-----------|----------|--------|---------|------------|------|------|---------|----|
| Chitinophagales    |    | *         | *        | *      | *       | *          | *    | *    | *       | *  |
| Pyrinomonadales    | *  |           |          | *      | *       |            | *    | *    |         | *  |
| Chitinophagales    | *  |           |          | *      | *       | *          |      | *    | *       | *  |
| ➡Methanotrichales  | *  | *         | *        | *      | *       | *          | *    | *    | *       | *  |
| ➡Thermoproteales   | *  | *         | *        |        | *       | *          |      | *    | *       | *  |
| ➡Methanosarcinales | *  | *         | *        | *      |         | *          | *    | *    | *       | *  |
| Vicinamibacterales | *  |           | *        | *      | *       |            |      | *    | *       | *  |
| Vicinamibacterales | *  | *         |          |        | *       |            |      | *    |         | *  |
| Actinomycetales    | *  | *         | *        | *      | *       | *          | *    |      | *       | *  |
| ➡Desulfurococcales | *  |           | *        | *      | *       | *          |      | *    | *       | *  |

**Supplemental Figure 1.** Correlogram of the 16S rRNA data and the geochemical data. Blue squares indicate positive correlations while red squares indicate negative correlations. An asterisk is shown if the correlation has a p-value of <0.05. 16S rRNA ZOTUs are shown at the phylogenetic level of order. Archaeal orders are noted with arrows.

Supplemental Table 1. Discriminating (p&lt;0.05) metabolites between years

| Metabolite                            | p.value  |
|---------------------------------------|----------|
| (5) 4-Aminoimidazola-4(5)-Carboxamide | 6.58e-05 |
| 1,2-Propanediol                       | 5.55e-03 |
| 2-Aminoethanol                        | 1.43e-17 |
| 2-Aminoethyl Phosphonic Acid          | 1.73e-04 |
| 2-Deoxy-D-Glucose-6-Phosphate         | 3.18e-02 |
| 2'-Deoxy Adenosine                    | 2.51e-08 |
| 2'-Deoxy Inosine                      | 1.42e-07 |
| 2'-Deoxy Uridine                      | 2.59e-13 |
| 2'-Deoxyguanosine                     | 2.11e-04 |
| 3-Methyl Glucose                      | 2.60e-11 |
| 5-Keto-D-Gluconic Acid                | 1.27e-05 |
| Adenine                               | 3.47e-04 |
| Adenosine                             | 3.47e-03 |
| Adenosine-2'-monophosphate            | 8.80e-03 |
| Adenosine-2',3'-cyclicmonophosphate   | 3.98e-07 |
| Adonitol                              | 1.77e-02 |
| Agmatine                              | 2.21e-05 |
| Ala-Asp                               | 2.18e-08 |
| Ala-Gln                               | 2.27e-06 |
| Ala-Gly                               | 2.93e-11 |
| Ala-His                               | 2.67e-02 |
| Ala-Leu                               | 2.81e-06 |
| Alaninamide                           | 1.98e-15 |
| Allantoin                             | 3.36e-02 |
| alpha-Amino-Caprylic Acid             | 2.02e-02 |
| alpha-GlycerolPhosphate               | 2.64e-06 |
| Amygdalin                             | 1.83e-02 |
| Arbutin                               | 2.89e-10 |
| Arginine                              | 6.17e-04 |
| Asparagine                            | 2.62e-10 |
| Biotin                                | 9.68e-04 |
| Bromo Succinic Acid                   | 5.17e-03 |
| Buïret                                | 2.75e-04 |
| Carnitine                             | 1.96e-05 |
| Cellobiose                            | 1.56e-10 |
| Citric Acid                           | 3.41e-08 |
| Cystathione                           | 6.76e-03 |
| Cysteamine                            | 1.49e-03 |
| Cysteic Acid                          | 6.31e-03 |

| Metabolite                          | p.value  |
|-------------------------------------|----------|
| Cytidine                            | 1.62e-06 |
| Cytidine-2'-monophosphate           | 1.16e-10 |
| Cytidine-2',3'-monophosphate        | 2.51e-09 |
| Cytosine                            | 1.40e-11 |
| D-1-N-Acetyl-D,L-Glutamic Acid      | 6.13e-05 |
| Djenkolic Acid                      | 7.60e-15 |
| Ethanolamine                        | 2.08e-09 |
| Ethylenediamine                     | 4.66e-03 |
| Galactosamine                       | 2.08e-03 |
| Gentiobiose                         | 2.69e-08 |
| Glucosamine-6-Phosphate             | 9.57e-04 |
| Glutamic Acid                       | 3.64e-07 |
| Glycyl-L-Methionine                 | 9.94e-10 |
| Guanosine                           | 1.55e-09 |
| Guanosine-2'-monophosphate          | 3.55e-02 |
| Guanosine-2',3'-cyclicmonophosphate | 4.50e-06 |
| Homoserine                          | 9.11e-11 |
| Inosine                             | 1.55e-09 |
| Lactitol                            | 4.01e-10 |
| Lysine                              | 1.80e-03 |
| Maltotriose                         | 2.41e-07 |
| Mannitol                            | 1.67e-10 |
| Melezitose                          | 3.33e-06 |
| Melibionic Acid                     | 3.35e-02 |
| Melibiose                           | 5.70e-07 |
| Methylene Diphosphonic Acid         | 8.20e-03 |
| N-Acetyl-D-Glucosaminitol           | 2.46e-15 |
| N-Acetyl-D-Neuraminic Acid          | 7.78e-14 |
| N-Butylamine                        | 2.13e-08 |
| Riboflavin                          | 7.11e-09 |
| Salicin                             | 5.62e-12 |
| Sec-Butylamine                      | 4.08e-06 |
| Spermidine                          | 2.17e-04 |
| Stachyose                           | 9.17e-05 |
| Tartaric Acid                       | 7.65e-05 |
| Thiamine                            | 9.84e-12 |
| Thymidine-3',5'-cyclicmonophosphate | 8.82e-04 |
| Xanthosine                          | 1.85e-02 |

Supplemental Table 2. Nitrogen formula determination

| m/z     | Formula       | Formulas Containing N(%) |
|---------|---------------|--------------------------|
| 192.158 | C9H21NO3      | 75                       |
| 223.987 | C5H7NO5P2     | 83                       |
| 347.201 | C16H32N2O2P2  | 83                       |
| 153.120 | C5H16N2O3     | 86                       |
| 218.138 | C10H19NO4     | 71                       |
| 301.124 | C9H20N2O9     | 82                       |
| 317.192 | C6H25N10O3P   | 87                       |
| 128.070 | C4H7N4O       | 50                       |
| 164.116 | C4H13N5O2     | 100                      |
| 231.082 | C5H14N2O8     | 100                      |
| 164.117 | C9H13N3       | 100                      |
| 577.412 | C20H48N16O4   | 93                       |
| 121.063 | C2H9N4P       | 100                      |
| 130.121 | C7H15NO       | 100                      |
| 112.050 | C4H5N3O       | 100                      |
| 209.092 | C10H12N2O3    | 83                       |
| 301.145 | C11H22N6P2    | 93                       |
| 372.219 | C8H21N17O     | 90                       |
| 277.103 | C5H13N10O2P   | 94                       |
| 532.337 | C23H46N7O5P   | 92                       |
| 312.206 | C13H26N7P     | 87                       |
| 782.483 | C24H64N17O10P | 95                       |
| 284.172 | C12H21N5O3    | 80                       |
| 482.260 | C16H36N9O6P   | 93                       |
| 149.037 | C4H8N2O2S     | 100                      |
| Average |               | 89                       |

Supplemental Table 3. Sulfur formula determination

| m/z     | Formula      | Formulas Containing S(%) |
|---------|--------------|--------------------------|
| 415.140 | C23H26O3S2   | 81                       |
| 493.311 | C25H49O5PS   | 85                       |
| 90.976  | C2H3PS       | 50                       |
| 216.919 | C6H3OP3S     | 100                      |
| 226.950 | C5H6O4S3     | 100                      |
| 229.084 | C8H21OPS2    | 71                       |
| 231.082 | C7H19O4PS    | 56                       |
| 417.138 | C16H37P5S    | 78                       |
| 420.882 | C7H19P3S7    | 89                       |
| 429.154 | C17H35O4P3S  | 82                       |
| 536.607 | C22H95OS5    | 77                       |
| 634.871 | C12H11O22PS3 | 93                       |
| 164.928 | H4O2S4       | 50                       |
| 393.186 | C18H33O5PS   | 73                       |
| 377.210 | C19H37OPS2   | 79                       |
| 429.155 | C24H28O3S2   | 84                       |
| 522.595 | C12H89O16S   | 77                       |
| 135.120 | C7H18S       | 100                      |
| 267.126 | C11H22O5S    | 53                       |
| 355.230 | C20H34O3S    | 75                       |
| 623.377 | C39H58S3     | 87                       |
| 217.081 | C10H17OPS    | 83                       |
| 207.121 | C13H18S      | 67                       |
| 220.880 | C2H5PS5      | 100                      |
| 359.244 | C20H38OS2    | 63                       |
| Average |              | 78                       |
